# Supplementary material for: Wavelength-sensitive CMOS-like optoelectronic inverter circuits based on solution-processable perovskite nanocrystals/organic semiconductor blends
Source: Royal Society of Chemistry journal article supplement (doi:10.1039/d5tc02341f), 2025-12-04
Supplement: d5tc02341f1.pdf [file d5tc02341f1.pdf]

## Supporting Information

### **Wavelength-Sensitive CMOS-like Optoelectronic Inverter Circuits Based on Solution-Processable Perovskite nanocrystals/Organic Semiconductor Blends**

*Junlong Zou<sup>a</sup>, Xiao Han<sup>a</sup>, Sufyan Aslam<sup>a</sup>, Lin He,<sup>a</sup> Zhiming Wang<sup>\*a</sup>, Thumu  
Udayabhaskararao<sup>\*a</sup>, Tim Leydecker<sup>\*a</sup>*

*a. Institute of Fundamental and Frontier Sciences, University of Electronic Science and  
Technology of China, Chengdu 610054, China*

## Table of Contents

| Figures  | Description                                                                              | Page no. |
|----------|------------------------------------------------------------------------------------------|----------|
|          | Experimental Section & Analytical Procedures                                             | 3        |
| Fig. S1  | The absorption spectra of polymers and perovskites NCs                                   | 5        |
| Fig. S2  | XRD patterns of CsPbBr <sub>3</sub> and CsPbI <sub>3</sub> NCs.                          | 5        |
| Fig. S3  | Photoelectric property of pure P(NDI2OD-T2)                                              | 6        |
| Fig. S4  | Photoelectric property of pure PDVT-10                                                   | 7        |
| Fig. S5  | Photoelectric property of pure CsPbBr <sub>3</sub> and CsPbI <sub>3</sub>                | 7        |
| Fig. S6  | AFM images showing the thickness hybrid NCs polymer composites                           | 8        |
| Fig. S7  | Photosensitivity, Responsivity, Detectivity                                              | 9        |
| Fig. S8  | Output curves of hybrid NCs polymer composites                                           | 10       |
| Fig. S9  | PESA studies of pure perovskites and polymers                                            | 11       |
| Fig. S10 | Photoelectric property of different weight ratios of NCs and polymers                    | 12       |
| Fig. S11 | Optical microscope image of the inverter circuit                                         | 12       |
| Fig. S12 | Transfer curves of CsPbBr <sub>3</sub> /PDVT-10 (weight ratio=1:10)                      | 13       |
| Fig. S13 | Butterfly inverter curves for NM calculation at VDD=60V                                  | 13       |
| Fig. S14 | Photosensitivity and threshold shift of CsPbBr <sub>3</sub> /PDVT-10 (weight ratio=10:1) | 13       |
| Table S1 | Comparison in Device Performance of hybrid complementary inverter.                       | 14       |
|          | References                                                                               | 15       |

## Experimental Section & Analytical Procedures

**Materials:** The organic semiconductors were purchased from Derthon (P(NDI2OD-T2)) and 1-Material (PDVT-10).

### Synthesis of CsPbX<sub>3</sub> (X = Br or I) NCs:

**Preparation of Cs-oleate:** Cs<sub>2</sub>CO<sub>3</sub> (0.814g, Heowns, 99%) was taken into 100 ml 3-neck flask along with 1-Octadecene (40ml, ODE, Aladdin, 90%) and oleic acid (2.5 mL, OA, Heowns, 90%), dried for 1 hour at 120 °C under vacuum, then heated under Ar to 150°C until all Cs<sub>2</sub>CO<sub>3</sub> reacted with oleic acid. Since Cs-oleate precipitates out of octadecene at room-temperature, it has to be preheated to ~100 °C before injection.

**Synthesis of CsPbX<sub>3</sub> NCs:** Octadecene (5 ml) and PbX<sub>2</sub> (0.188 mmol) such as PbI<sub>2</sub> (0.087g, Aladdin, 99.999%) or PbBr<sub>2</sub> (0.069g, Aladdin, 99.9%), were loaded into 50 mL 3-neck flask and dried for 1 hour at 120°C under vacuum. Dried oleylamine (0.5mL, OLAm, Heowns, 95%) and dried oleic acid (OA, 0.5 mL) were injected at 120 °C under Ar. Now temperature was raised to 140-200°C (for tuning the NC size) and Cs-oleate solution (0.4 mL, 0.125 M in ODE, prepared as described above) was quickly injected, and after 5s, the reaction mixture was cooled by the ice-water bath.

**Isolation and purification of CsPbX<sub>3</sub> NCs.** The combined NCs were separated by centrifuging after the crude solution was cooled using a water bath. For smaller NCs synthesized below 160 °C, centrifugation with the addition of dry methyl acetate (Damas-Beta, 99%) to the crude solution (ODE:Methyl acetate = 1:1 by volume) was shown to be beneficial for a complete precipitation. After centrifugation, the particles were re-dispersed in hexane or toluene to create long-term colloiddally stable solutions, and the supernatant was disposed of.

**Device Fabrication:** In this work, interdigitated bottom-contact bottom-gate configuration organic phototransistors were fabricated. Highly doped silicon wafers with 300 nm of thermally grown SiO<sub>2</sub> as the gate dielectric. Standard lithography procedures were used to pattern the wafers with Au electrodes of 50 nm using 10 nm of Ti as an adhesion layer. The channel length(L) and the width(W) of fabricated devices are 20 μm and 10 mm respectively. The

substrates were ultrasonically cleaned in acetone, isopropyl alcohol each for 30 min, and blown dry by nitrogen gas, and further treated by UV-ozone in the air for 5 min. The octadecyltrichlorosilane (OTS)-treated Si/SiO<sub>2</sub> substrates were used to suppress charge trapping effect between semiconductor/dielectric (see below). Samples with organic semiconductors in the channel were fabricated by spin-coating of the semiconductor or semiconductor /perovskite solution at a total concentration of 5 mg/mL, at 4000 rpm for 60s. All the solutions were prepared using chloroform as solvent. All solutions, samples and devices were prepared and measured in a nitrogen filled glovebox to avoid oxidative doping and degradation of the materials and ensure reproducibility of the experiments.

OTS treatment consisted of an overnight immersion of the UV-ozone cleaned substrate into a 1 mill molar solution of OTS in toluene starting with a 1-hour heating of the solution at 60°C. The overnight immersion was followed by rinsing with clean toluene and annealing of the clean substrates for 30 minutes at 60°C to remove all traces of solvent. The immersion, rinsing, and annealing steps were performed in a nitrogen atmosphere.

**Characterization:** Transistor properties were evaluated either under positive or negative gate bias to explore the majority charge carrier type and device performance (positive bias for P(NDI2OD-T2) containing devices and negative bias for PDVT-10 containing devices. Transfer curves were obtained by measuring the IDS as a function of the gate bias from -60 V to +60 V (P(NDI2OD-T2)) and from +60 V to -60 V (PDVT-10) with one point measured every 2 V, using a Keithley 2636B sourcemeter.

A xenon lamp light source connected with a monochromator, the emitted light will be introduced into the glovebox through an optical fiber and placed at a height of 5 cm from the device to provide illumination at irradiances between 0.02 to 0.2 mW cm<sup>-2</sup> for characterizing the photo-response of devices. We use monochromator to do the illumination test with the wavelength interval equal to 10nm. Firstly, get the dark transfer curves, waiting 100s for the recombination of the remaining electron holes in the channel, then get the illumination transfer curves, waiting 100s for the next dark transfer curves. All electrical characterization was performed in a nitrogen environment.

## Supplementary Figures

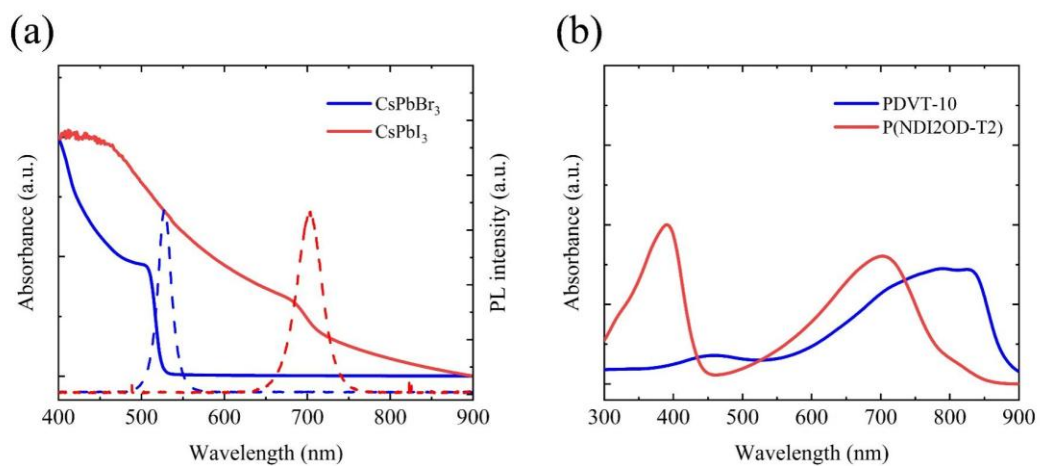

Figure S1. The absorption spectra of (a) pristine PDVT-10 and P(NDI2OD-T2) film, and (b) pristine CsPbBr<sub>3</sub> and CsPbI<sub>3</sub>NCs film

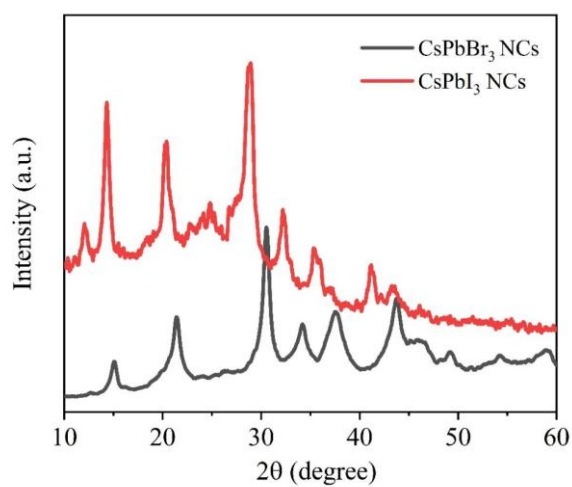

Figure S2. XRD patterns of CsPbBr<sub>3</sub> and CsPbI<sub>3</sub> NCs.

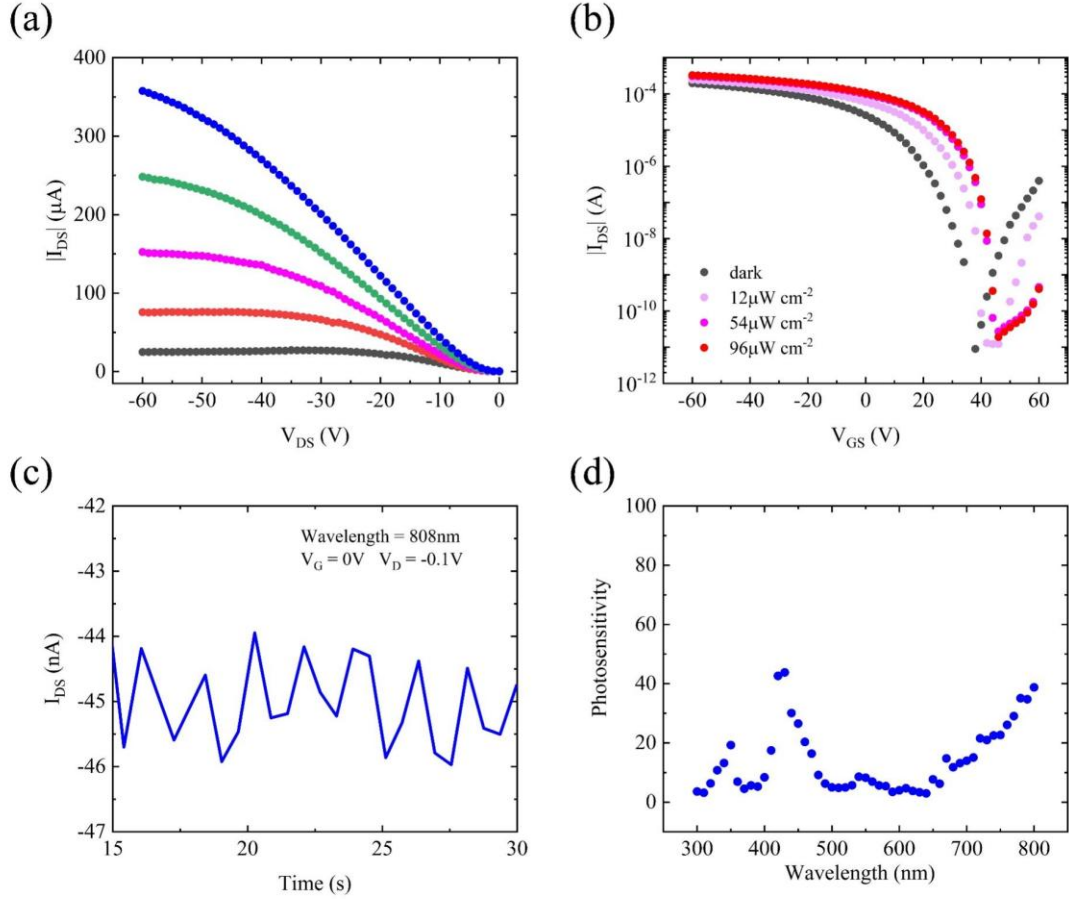

Figure S3 (a) The output curves of PDVT-10 based transistor under dark ( $V_{GS}$  swept from 0 to -40V). (b) Transfer curves of the transistor based on pure PDVT-10 under 808nm light illumination with different power intensity at a bias voltage of -20V. (c) Transient response of transistor based on PDVT-10 under 808 nm light pulse at  $V_G=0$  V,  $V_D=-5$  V. (d) The photoresponsivity of pure PDVT-10 measured under different wavelengths.

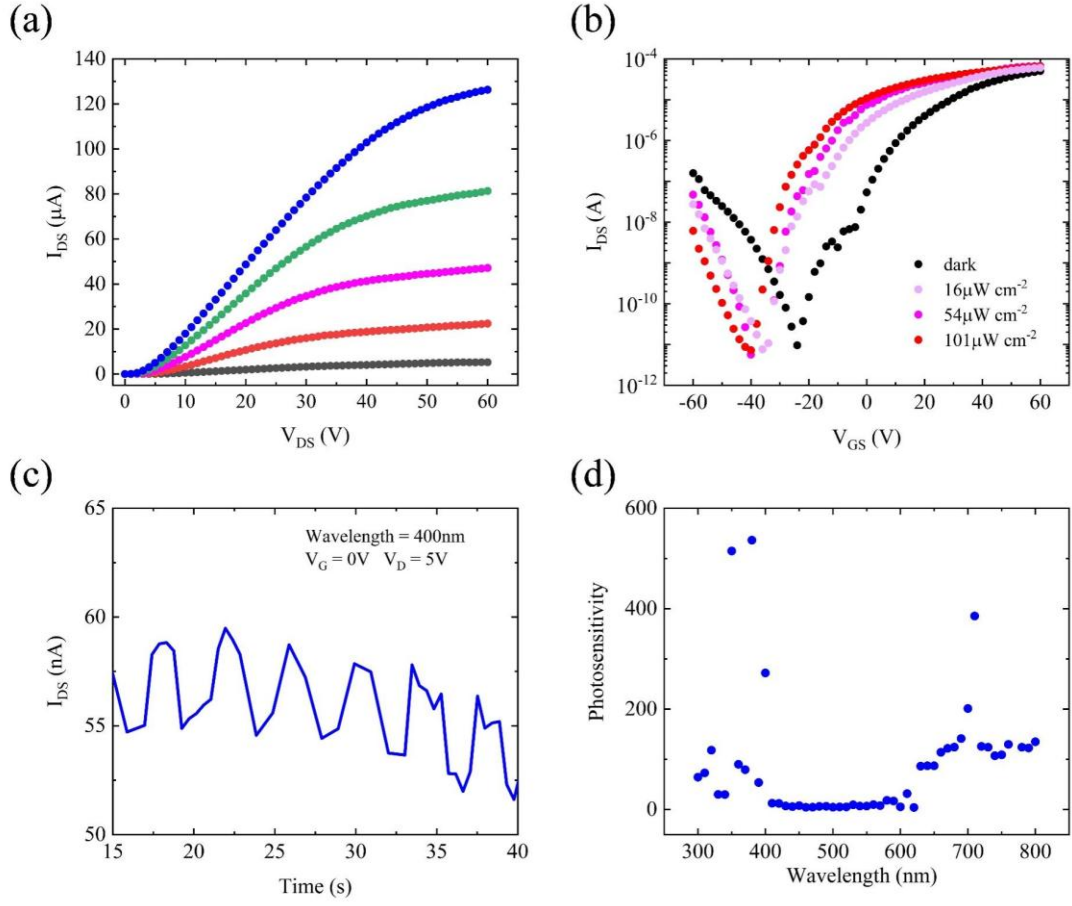

Figure S4 (a) The output curves of P(NDI2OD-T2) based transistor under dark ( $V_{GS}$  swept from 0 to 40V). (b) Transfer curves of the transistor based on pure P(NDI2OD-T2) under 400nm light illumination with different power intensity at a bias voltage of 20V. (c) Transient response of transistor based on P(NDI2OD-T2) under 400 nm light pulse at  $V_G=0$  V,  $V_D= 5$  V. (d) The photoresponsivity of pure P(NDI2OD-T2) measured under different wavelengths.

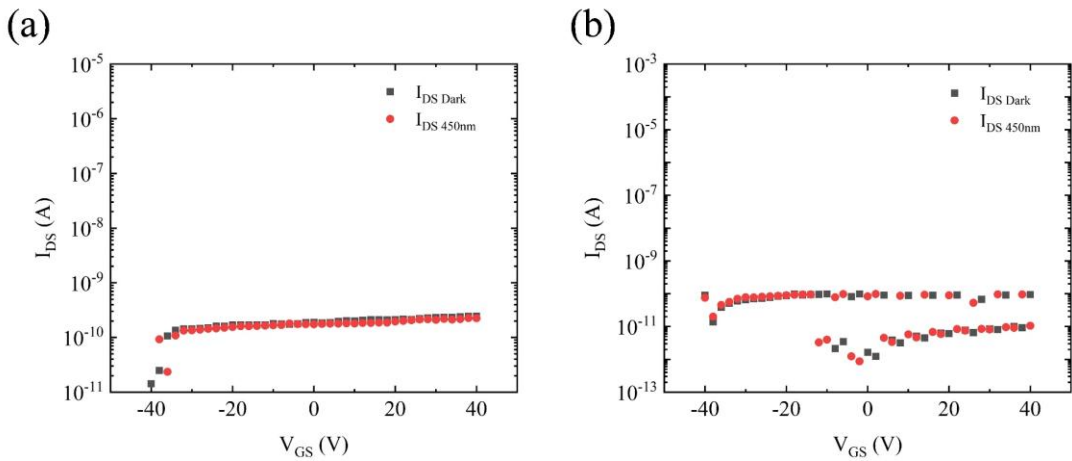

Figure S5 Transfer characteristics for (a) CsPbBr<sub>3</sub> and (b) CsPbI<sub>3</sub> NCs transistors under dark and illumination

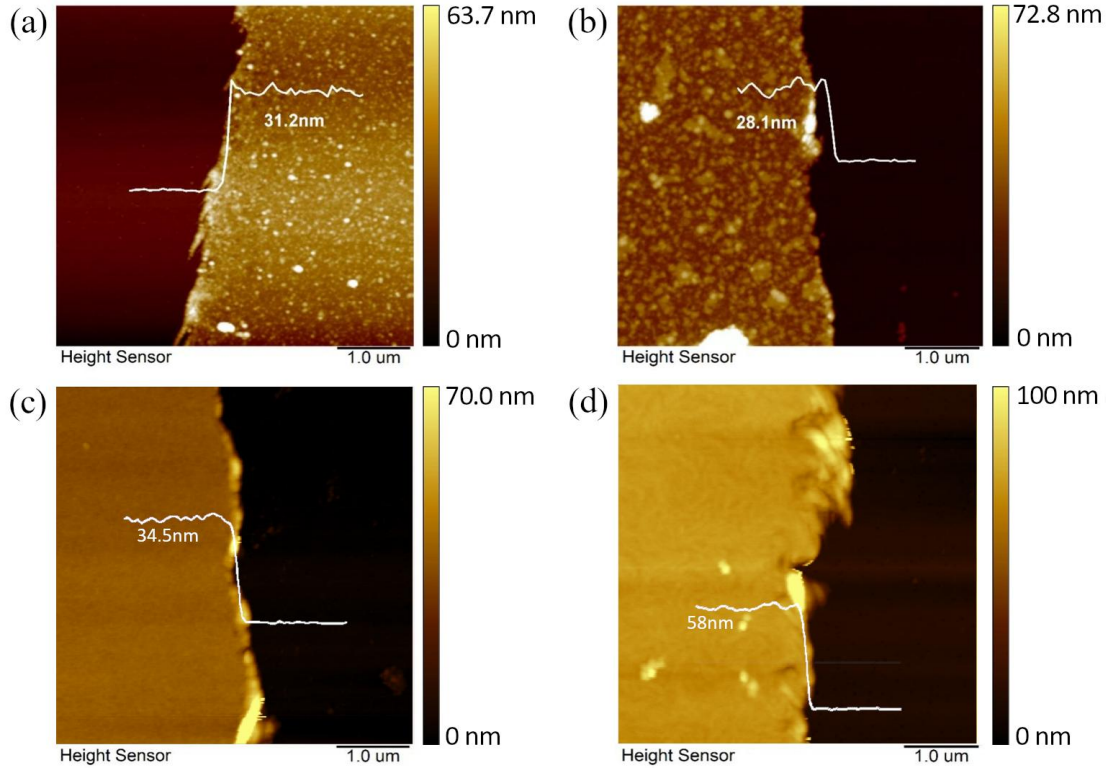

Figure S6. AFM height plot showing the thickness of (a) CsPbBr<sub>3</sub>/PDVT-10 films, (b) CsPbI<sub>3</sub>/P(NDI2OD-T2) films, (c) PDVT-10 films and (d) P(NDI2OD-T2) films.

The calculation formulas of Photosensitivity(P), Responsivity(R) and Detectivity(D):

$$P = \frac{I_{\text{Light}} - I_{\text{Dark}}}{I_{\text{Dark}}}$$

$$R = \frac{I_{\text{light}} - I_{\text{dark}}}{P_{\text{intensity}} WL}$$

$$D^* = R \sqrt{\frac{WL}{2eI_{\text{dark}}}}$$

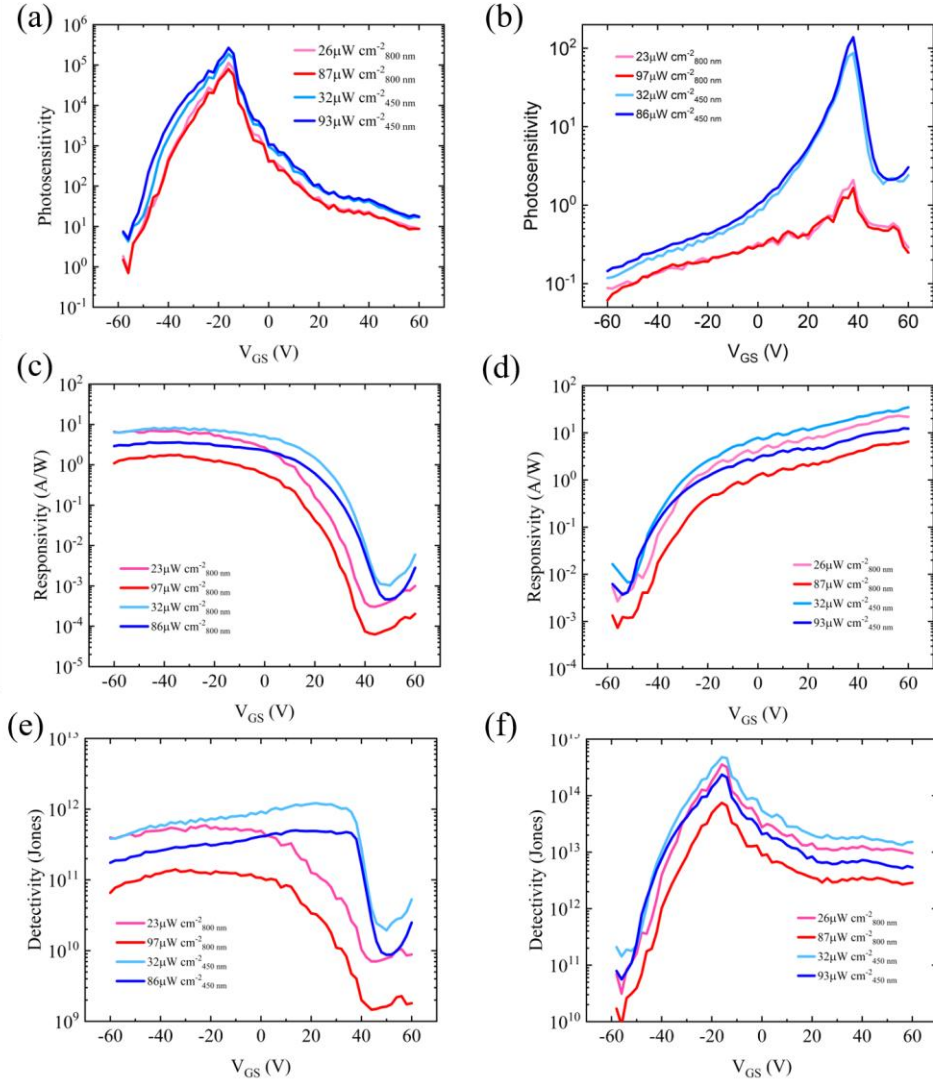

Figure S7. Photosensitivity as a function of  $V_{GS}$  of PhotoFETs based on (a) PDVT-10/CsPbBr<sub>3</sub> and (b) P(NDI2OD-T2)/CsPbI<sub>3</sub>. Responsivity as a function of  $V_{GS}$  of PhotoFETs based on (c) PDVT-10/CsPbBr<sub>3</sub> and (d) P(NDI2OD-T2)/CsPbI<sub>3</sub>. Detectivity as a function of  $V_{GS}$  of PhotoFETs based on (a) PDVT-10/CsPbBr<sub>3</sub> and (b) P(NDI2OD-T2)/CsPbI<sub>3</sub>.

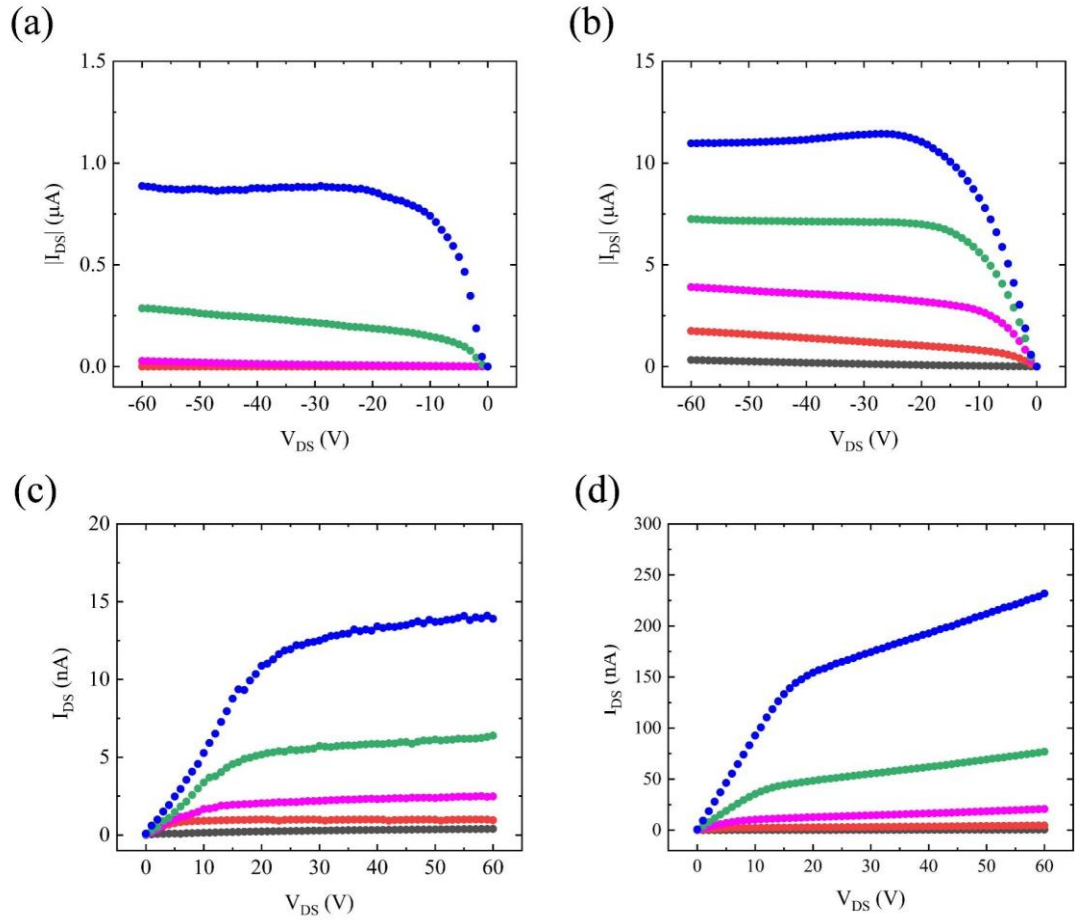

Figure S8. Output characteristics of CsPbBr<sub>3</sub>/PDVT-10 ( $V_{GS}$  swept from 0 to 40 V) and CsPbI<sub>3</sub>/P(NDI2OD-T2) ( $V_{GS}$  swept from 0 to -40 V) (a), (c) in dark and (b), (d) under illumination at 450 nm.

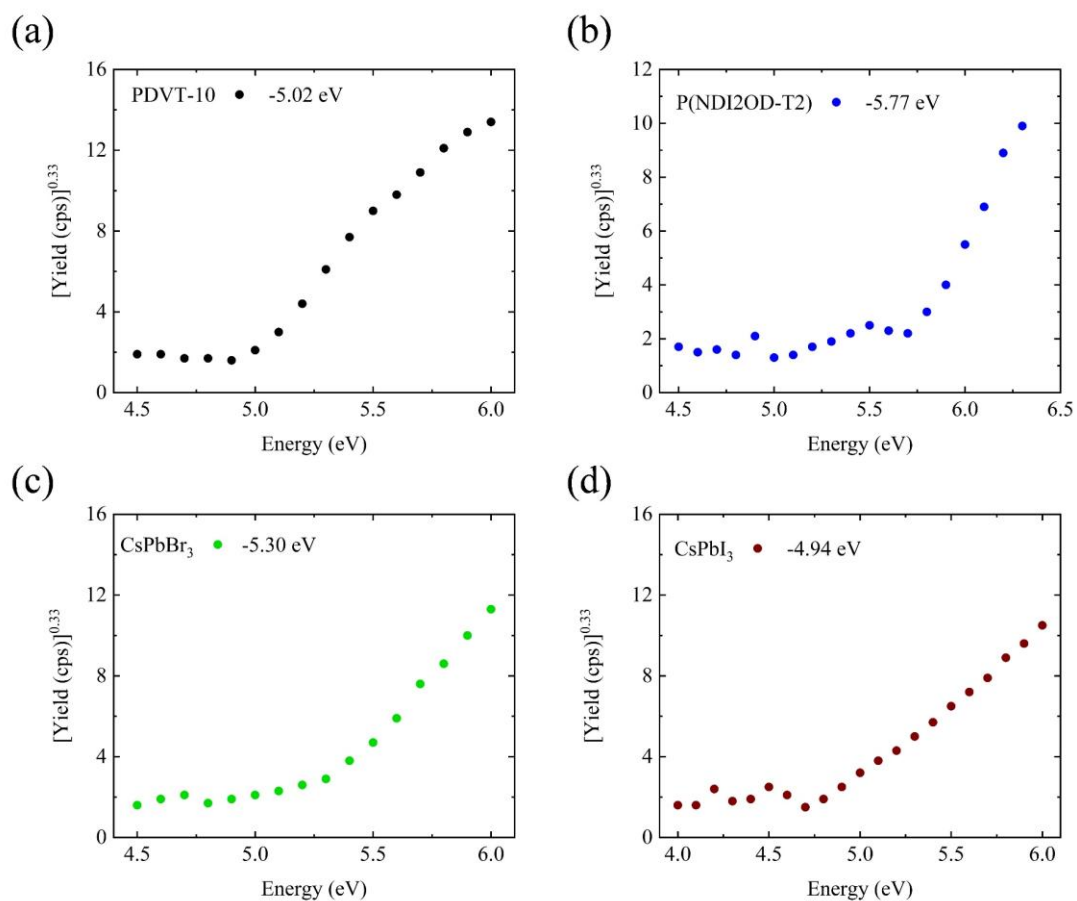

Figure S9. PESA studies carried out for HOMO of (a) PDVT-10 (b) P(NDI2OD-T2), and Ev of (c) CsPbBr<sub>3</sub> (d) CsPbI<sub>3</sub>

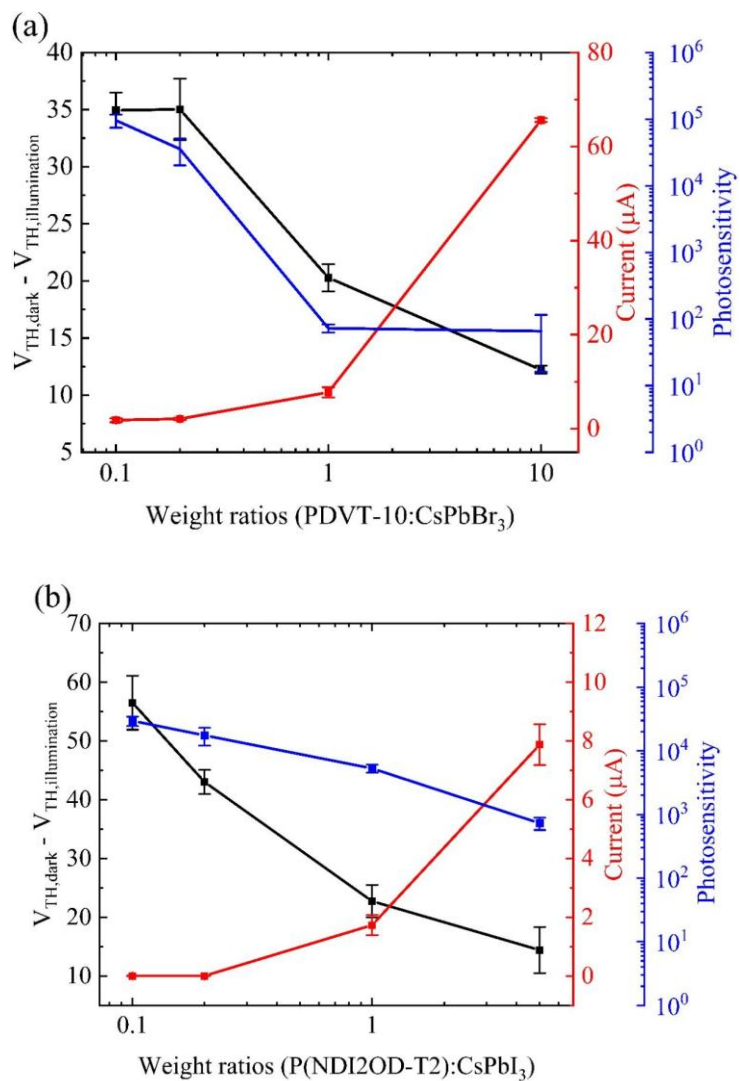

Figure S10. Threshold shift, photosensitivity and maximum current of different weight ratio.  
(a) CsPbBr<sub>3</sub>/PDVT-10 (b) CsPbI<sub>3</sub>/P(NDI2OD-T2).

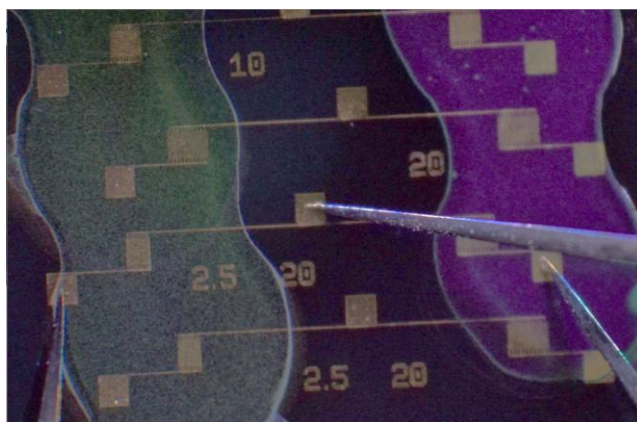

Figure S11. Optical microscope image of inverter after the two spin-coating steps.

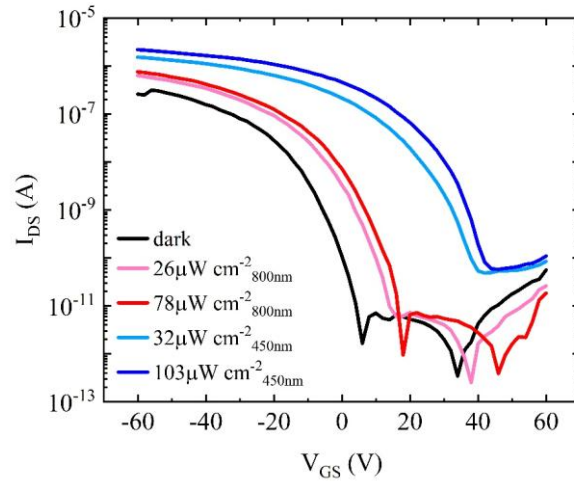

Figure S12. Transfer curves of CsPbBr<sub>3</sub>/PDVT-10 (weight ratio=10:1) under illumination with different light densities and wavelength.

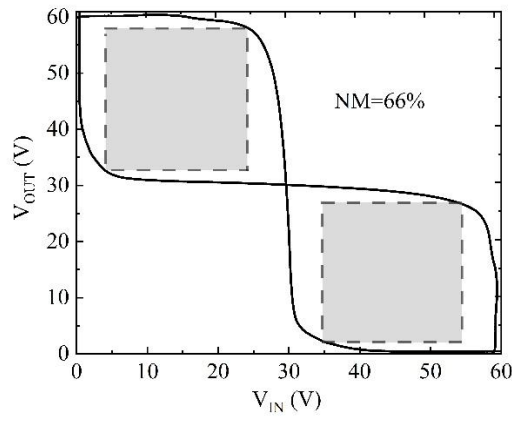

Figure S13. Butterfly inverter curves for NM calculation at  $V_{DD}=60V$

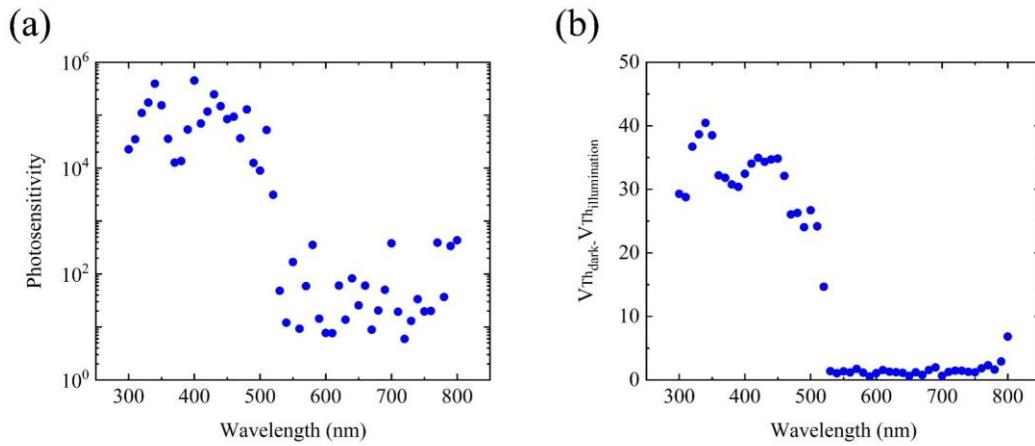

Figure S14. Performance of (a) photosensitivity and (b) threshold shift of CsPbBr<sub>3</sub>/PDVT-10 (weight ratio=10:1) along with wavelength.

Table S1. Comparison in Device Performance of hybrid complementary inverter.

| Multi-wavelength detection | N-channel material              | Family   | P-channel material                   | Family   | Voltage Gain | switching voltage difference | Ref       |
|----------------------------|---------------------------------|----------|--------------------------------------|----------|--------------|------------------------------|-----------|
| No                         | Pentacene                       | OSC      | F16CuPc                              | OSC      | 5            | 5/40-10/40                   | [1]       |
| No                         | Pentacene                       | OSC      | MoS <sub>2</sub> /MAPbI <sub>3</sub> | TMD/PVSK | 9            | N/A                          | [2]       |
| No                         | ZnO/QDs                         | QD       | R=2M $\Omega$                        | \        | N/A          | 2.5/35                       | [3]       |
| No                         | FACs/C16-IDTBT                  | OSC/PVSK | FACs/C16-IDTBT                       | OSC/PVSK | 9            | N/A                          | [4]       |
| No                         | FACs/C8-BTBT                    | OSC/PVSK | FACs/C8-BTBT                         | OSC/PVSK | 15           | 2/10                         | [4]       |
| No                         | n-Si NW                         | NW       | p-Si NW                              | NW       | 2.5          | 2/10                         | [5]       |
| Yes                        | BPE-PTCDI/PDI-sol               | OSC      | DNTT/C10-DNTT                        | OSC      | 3            | 1/5                          | [6]       |
| Yes                        | Pentacene                       | OSC      | PTCDI-C5                             | OSC      | N/A          | 6/40                         | [7]       |
| Yes                        | P(NDI2OD-T2)/CsPbI <sub>3</sub> | OSC/PVSK | PDVT-10/CsPbBr <sub>3</sub>          | OSC/PVSK | 28           | 21/60                        | This work |

## References

- [1] S. Kim, T. Lim, K. Sim, H. Kim, Y. Choi, K. Park, S. Pyo, *ACS Appl. Mater. Interfaces* **2011**, 3, 1451.
- [2] F. Liu, Y. Zhang, J. Wang, Y. Chen, L. Wang, G. Wang, J. Dong, C. Jiang, *Nanotechnology* **2021**, 32, 015203.
- [3] B. J. Kim, S. Park, S. K. Cha, I. K. Han, S. J. Kang, *RSC Adv.* **2018**, 8, 23421.
- [4] Y.-H. Lin, W. Huang, P. Pattanasattayavong, J. Lim, R. Li, N. Sakai, J. Panidi, M. J. Hong, C. Ma, N. Wei, N. Wehbe, Z. Fei, M. Heeney, J. G. Labram, T. D. Anthopoulos, H. J. Snaith, *Nat Commun* **2019**, 10, 4475.
- [5] J. Yoo, Y. Kim, D. Lim, S. Kim, *Opt. Express* **2018**, 26, 3527.
- [6] C. Hung, Y. Chiang, Y. Lin, Y. Chiu, W. Chen, *Advanced Science* **2021**, 8, 2100742.
- [7] G. Tarsoly, S. Pyo, *Sensors and Actuators A: Physical* **2021**, 332, 113178.
